# Supplementary material for: Structural and mechanistic basis of differentiated inhibitors of the acute pancreatitis target kynurenine-3-monooxygenase
Source: PubMed Central journal article supplement (PMC5477544; doi:10.1038/ncomms15827), 2017-06-12
Supplement: ncomms15827-s1.pdf [file ncomms15827-s1.pdf]

## SUPPLEMENTARY FIGURES

KMO protein sequence alignment (Boxed residues are within 4Å of UPF648 and are all conserved except Tyr 323)

|     |                       |                           |                  |                |                        |                      |                      |          |              |                      |                      |                      |
|-----|-----------------------|---------------------------|------------------|----------------|------------------------|----------------------|----------------------|----------|--------------|----------------------|----------------------|----------------------|
| 1   | MDSSVIQRKKVAVIGGGLVGS | LQACFLAKRNFQIDVYEARE      | DRVATFTRG--RSINL | ALSHRGRQAL     | Human_O15229           |                      |                      |          |              |                      |                      |                      |
| 1   | -----MSESVAIIGAGLVGC  | LAALAFSKEGYNVTLYDFRQDPR   | LDTTKNKNLKSINLAI | SARGIDAL       | Saccharomyces_P38169   |                      |                      |          |              |                      |                      |                      |
| 1   | -MTATDNARQVTIIGAGLAGT | LVARLLARNGWQVNLFFERRPDPRI | ETGARG--RSINL    | LAERGAHAL      | Pseudomonas_Q84HF5     |                      |                      |          |              |                      |                      |                      |
|     |                       |                           |                  |                | 53                     |                      |                      |          |              |                      |                      |                      |
| 67  | KAVG--LEDQIVSQGIPMRAR | MIHSLSGKKSAPYG-TKSQY      | ILSVSRENLNKD     | LLTAAEKYPNVKMH | Human_O15229           |                      |                      |          |              |                      |                      |                      |
| 63  | KSIDPDACEHILQDMIPMKGR | MIHDLKGRQESQLYG-LHGEA     | INSINRSVNLNS     | LLDELEKS-TTELK | Saccharomyces_P38169   |                      |                      |          |              |                      |                      |                      |
| 66  | RLAG--LEREVLAEAVMMRGR | MVHVPGTTPPNLQPYGRDD       | SEVWWSINRDR      | LNRI           | LLDGAEAA-GASIH         | Pseudomonas_Q84HF5   |                      |          |              |                      |                      |                      |
|     |                       | 83                        | 97               | 104            |                        |                      |                      |          |              |                      |                      |                      |
| 132 | FNHRLKCNPEEG---MITV   | LGSD-KVPKDVTC             | DLIVGCDGAYS      | TVRS           | HLMKKPRFDYSQYIPHGYM    | Human_O15229         |                      |          |              |                      |                      |                      |
| 129 | FGHKLVKIEWTDDKQICHFAI | GEDLKTPEHTEKYDFVI         | GCDGAYSATRS      | QMQRKVEMDF     | SOEYMNLRVI             | Saccharomyces_P38169 |                      |          |              |                      |                      |                      |
| 131 | FNLG                  | LDSVDFARQLT               | LSNV             | SGER---        | LEKRFHLLIGADGCNSAVR    | QAMASVVDLGEHLETPHGYK | Pseudomonas_Q84HF5   |          |              |                      |                      |                      |
|     |                       |                           |                  |                |                        | 169                  |                      |          |              |                      |                      |                      |
| 196 | ELTIPP-----KNGDYAME   | PNYLHIWPRN                | TFMMIALPNM       | NKSFTCT        | IMPFE-----FEKL         | Human_O15229         |                      |          |              |                      |                      |                      |
| 197 | ELYIPPTTEEFKPNYGCNFAI | APDHLHIWPRHK              | FMLIALANS        | DGSGFTST       | FGSKDQ-----ISDL        | Saccharomyces_P38169 |                      |          |              |                      |                      |                      |
| 195 | ELQITP-----EASAQFN    | LEPNALHIWPH               | GDYMCIAL         | ENLDRSET       | VTLFLHHQSPAAQPASPCFAQL | Pseudomonas_Q84HF5   |                      |          |              |                      |                      |                      |
|     |                       | 221                       | 230              | 232            | 246                    |                      |                      |          |              |                      |                      |                      |
| 248 | LTSN-DVVDFFQKYFPDAI   | FLIGEKL                   | LVQDFLL          | PAQPMISVK      | CSSFHFKS-HCVLLGDA      | AHAIVFEF             | Human_O15229         |          |              |                      |                      |                      |
| 256 | ITSKSRVREFLIENFPDI    | INIMLDDAVKRF              | ITYPKESLVC       | VNCKPYD        | PGGKAILLGDA            | AHAMVFEF             | Saccharomyces_P38169 |          |              |                      |                      |                      |
| 257 | VDGH-AARRFFQRQFPDLS   | FMLDS--LEQDFE             | HHPTGKL          | LATLRLTTW      | HVGG-QAVLLGDA          | AHPMVEFH             | Pseudomonas_Q84HF5   |          |              |                      |                      |                      |
|     |                       |                           |                  |                |                        |                      | 321/322/323          |          |              |                      |                      |                      |
| 314 | GGMNA                 | GFEDCLV                   | DELMDKF          | SNDLSLC        | LPVFSRLRI              | PDDHATSDLS           | SMYNIEMRAHVNS        | SWFIFQKN | Human_O15229 |                      |                      |                      |
| 324 | GGMNC                 | GFEDVRI                   | LMALLK           | KHSGDRS        | RAFTEYTQ               | TRHKDLV              | SITELAKRNY           | KEMSHDVT | SKRFLLRKK    | Saccharomyces_P38169 |                      |                      |
| 321 | GGMNC                 | ALEDAVAL                  | AHLQSA           | ADNAS-ALAA     | FTAQRQ                 | PDALAIQAMA           | LENYVEMS             | SKVASPTY | LLERE        | Pseudomonas_Q84HF5   |                      |                      |
|     |                       |                           |                  |                |                        |                      |                      |          |              | 324                  |                      |                      |
| 382 | MERFL                 | HAIMPSTFI                 | PLYTMVTF         | -SRIRY         | HEAVQR                 | WHWQKKV              | VINKGLFF             | LGLSLI   | ATSSTY       | LLIHYMSPR            | Human_O15229         |                      |
| 392 | LDALF                 | SIIMKDK                   | WIPLYT           | MISFRSDI       | YSRALER                | AGKQTRI              | LKFL                 | ESLT     | LGMLSIG      | GGYKLFKFL            | TRER                 | Saccharomyces_P38169 |
| 388 | LGQ                   | IMAQRQ                    | PTRFIP           | RYSMVTF        | -SRLPYA                | QAMARGQIQE           | QLKFAVAN             | HSDLT    | SINL         | DAVEHEVTRCL          | Pseudomonas_Q84HF5   |                      |
|     |                       |                           |                  |                |                        |                      |                      |          |              |                      | 394                  |                      |
| 449 | SFL                   | RLRRP                     | WNWIA            | HFRNTT         | CFPAK                  | AVDSLE               | QISNLI               | SR       |              |                      | Human_O15229         |                      |
| 460 | S                     |                           |                  |                |                        |                      |                      |          |              |                      | Saccharomyces_P38169 |                      |
| 455 | PP                    | LSHLC                     |                  |                |                        |                      |                      |          |              |                      | Pseudomonas_Q84HF5   |                      |

Residues deleted in yeast crystal structure construct

Sequence identities: human/yeast 38%, human/pseudomonas 35%, yeast/pseudomonas 35%

### Supplementary Figure 1 Alignment of KMO sequences of Human, Scacharmyces and Pseudomonas fluorescens

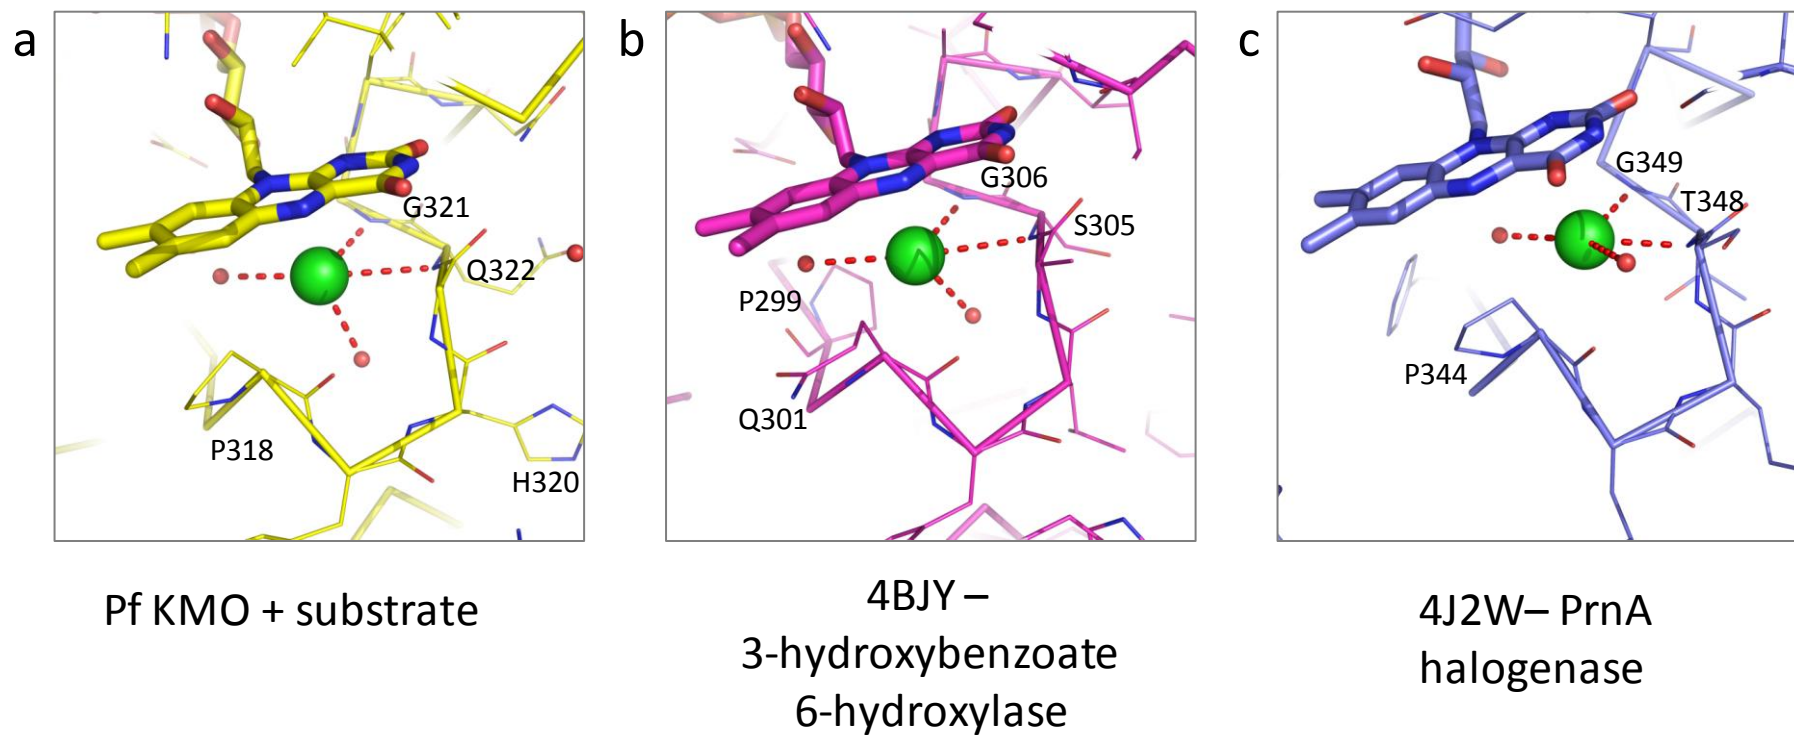

**Supplementary Figure 2 Similarity of chloride ion proximal to catalytic flavin of three FAD-dependent enzymes**

**(a)** Pf-KMO, **(b)** 3-hydroxybenzoate6-hydroxylase (PDB: 4BJY) and **(c)** PrnA halogenase (PDB: 4J2W)

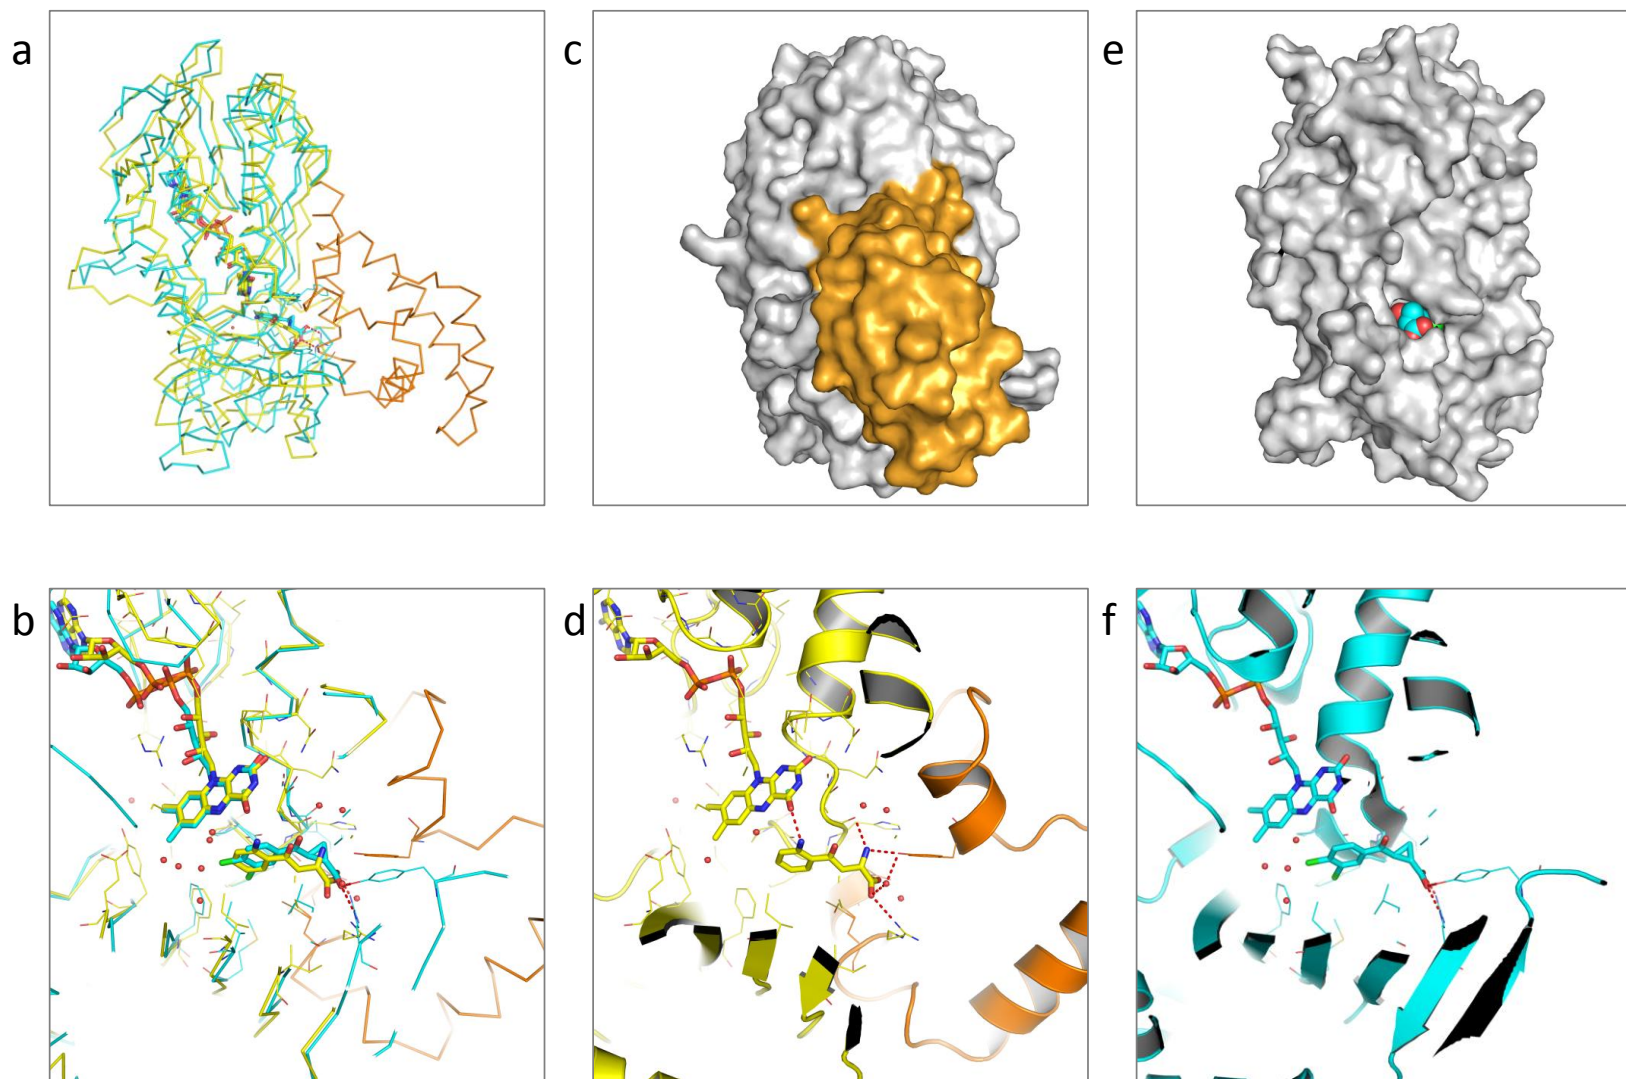

**Supplementary Figure 3 Comparison of Pf-KMO-Kyn substrate complex with *Saccharomyces cerevisiae* KMO-394UPF inhibitor complex (cyan carbons, PDB 4J36)**  
**(a)** Structural overlay of yeast (cyan) and Pf structures (domain1 and 2 in yellow, domain 3 in orange)). Domain 3 is not present in the protein crystallised yeast structure.  
**(b)** Enlarged view of (a) focused on the active site. **(c)** Pf-KMO-Kyn substrate complex shown as surface representation with orange colouring to highlight domain 3 **(d)** Enlarged view of the Pf-KMO active site of (c) without protein surface **(e)** Yeast structure in the same orientation as (b) highlighting the substrate capping effect of domain 3 **(f)** Enlarged view of the active site of *Saccharomyces cerevisiae* (c) without protein surface.

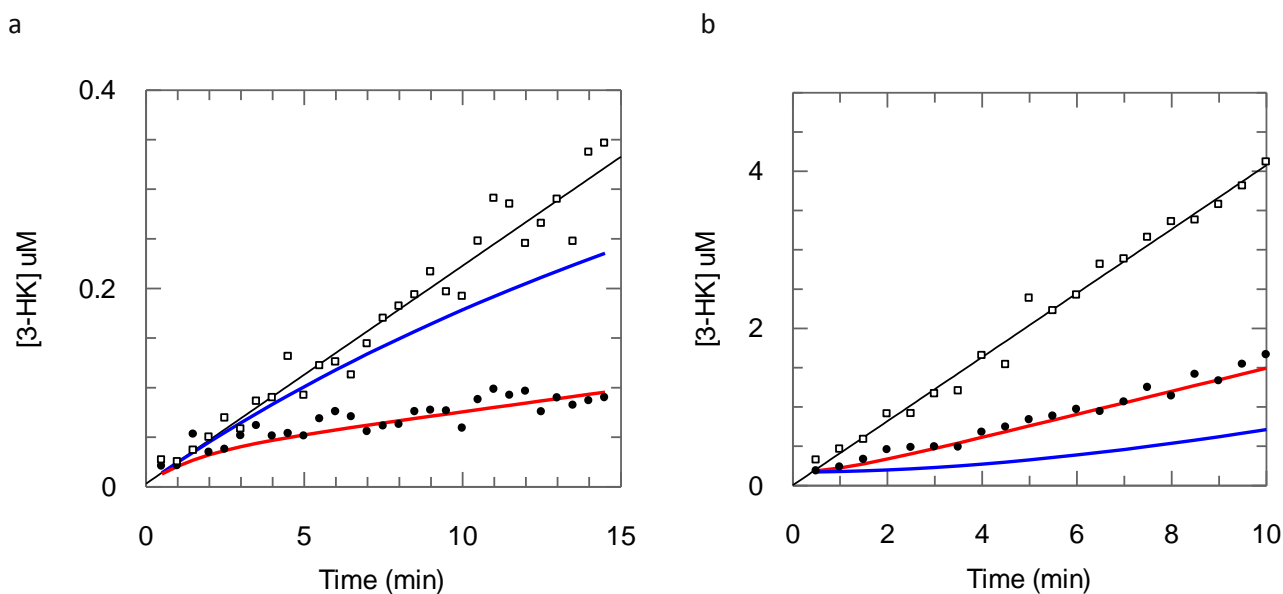

#### Supplementary Figure 4. Simulations of association and dissociation timecourses for inhibition of KMO by GSK428(A2)

**(a)** Onset of inhibition for GSK428(A2). The uninhibited timecourse (open symbols) was fitted to a straight line to give the uninhibited rate ( $V_i = 0.022 \mu\text{M}/\text{min}$ ), the gradient of the last 5 minutes of the timecourse in the presence of 10 nM GSK428(A2) (closed symbols) was taken as the steady-state rate ( $V_s = 0.004 \mu\text{M}/\text{min}$ ). These two values were used to simulate timecourses for onset of inhibition with  $k_{\text{obs}} = 0.062 \text{ min}^{-1}$  (blue) and  $k_{\text{obs}} = 0.62 \text{ min}^{-1}$  (red), using Equation 1 (Supplementary Methods). **(b)** Dissociation of GSK428(A2). The uninhibited timecourse (open symbols) was fitted to a straight line to give the uninhibited rate, the gradient of the last 5 minutes of the timecourse in the presence of GSK428(A2) (closed symbols) was taken as the steady-state rate after equilibration of inhibitor binding ( $V_s = 0.147 \mu\text{M}/\text{min}$ ). This value was used to simulate timecourses for recovery of activity with  $k_{\text{obs}} = 0.1 \text{ min}^{-1}$  (blue) and  $k_{\text{obs}} = 1.0 \text{ min}^{-1}$  (red), using Equation 1 with  $V_i$  set to zero.

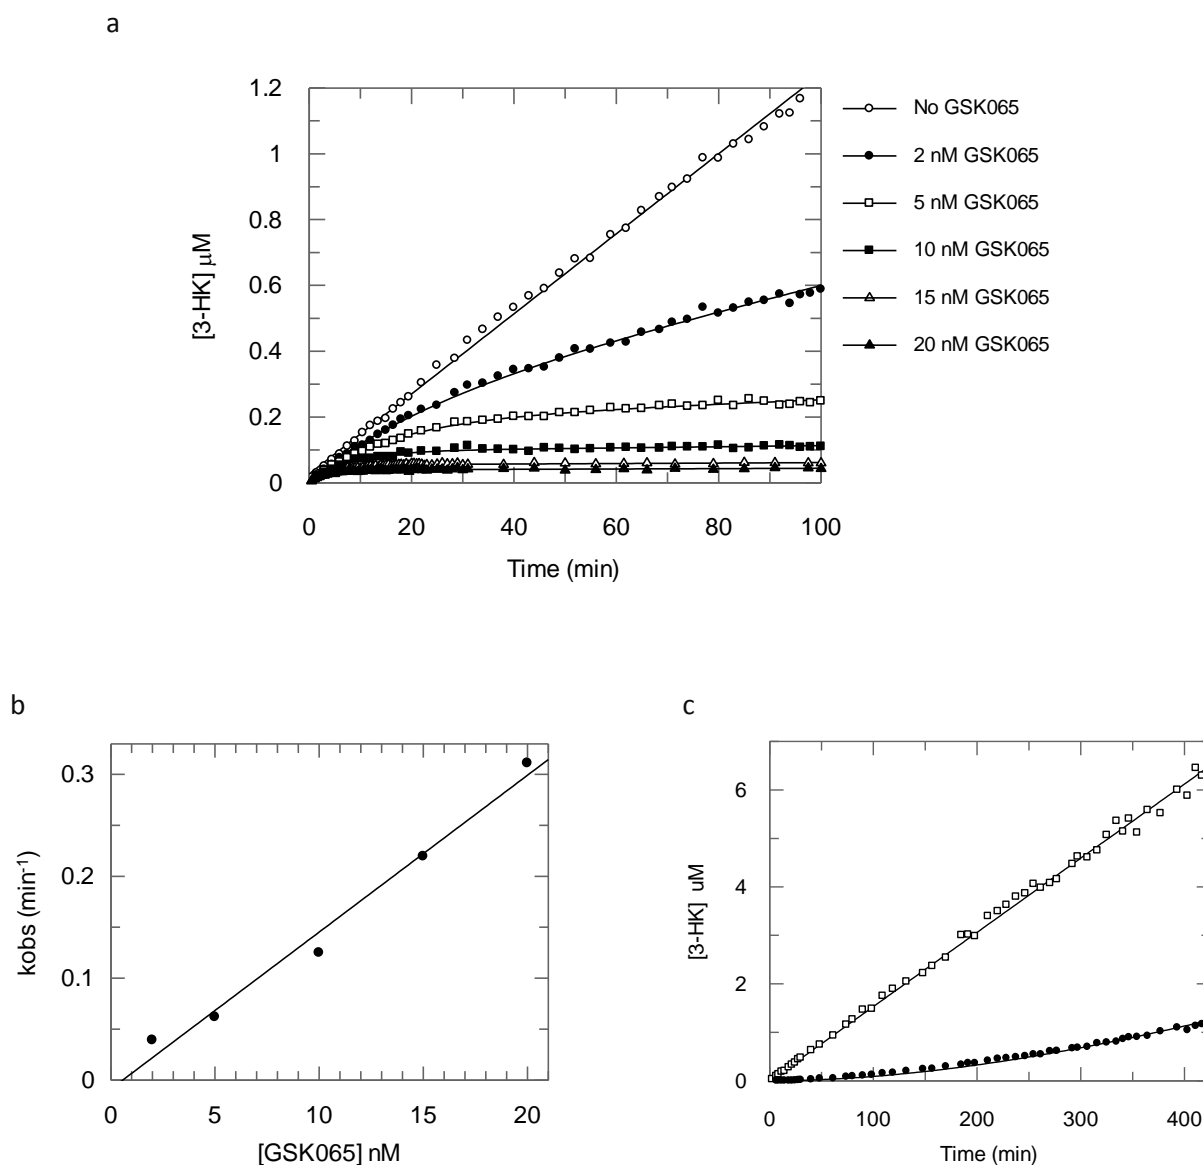

### Supplementary Figure 5. Detailed kinetic analysis of inhibition of KMO by GSK065(C1)

(a) Onset of inhibition timecourses measured in a range of concentrations of GSK065(C1).  $k_{\text{obs}}$  at each inhibitor concentration was obtained by fitting timecourses to Equation 1 (Supplementary Methods). (b) Plot of the resulting  $k_{\text{obs}}$  values against [GSK065(C1)];  $k_{\text{on}}$  was obtained from a linear fit of the data.  $k_{\text{on}} = 6.3 \times 10^5 \text{ M}^{-1}\text{s}^{-1}$  (average of two determinations). (c) Dissociation of GSK065(C1) from KMO. Recovery of activity timecourse was measured after adding a high concentration of L-Kyn to a pre-equilibrated mixture of KMO and inhibitor (closed symbols). [GSK065(C1)] = 5 nM after addition of L-Kyn. The uninhibited timecourse was generated in an equivalent way, omitting the inhibitor (open symbols).  $k_{\text{off}}$  for the inhibitor was obtained by simultaneously fitting both timecourses to a competitive binding model (Supplementary Methods), with  $k_{\text{on}}$  fixed at  $6.3 \times 10^5 \text{ M}^{-1}\text{s}^{-1}$  (see above).  $k_{\text{off}} = 3.2 \times 10^{-5} \text{ s}^{-1}$  (average of two determinations).

a

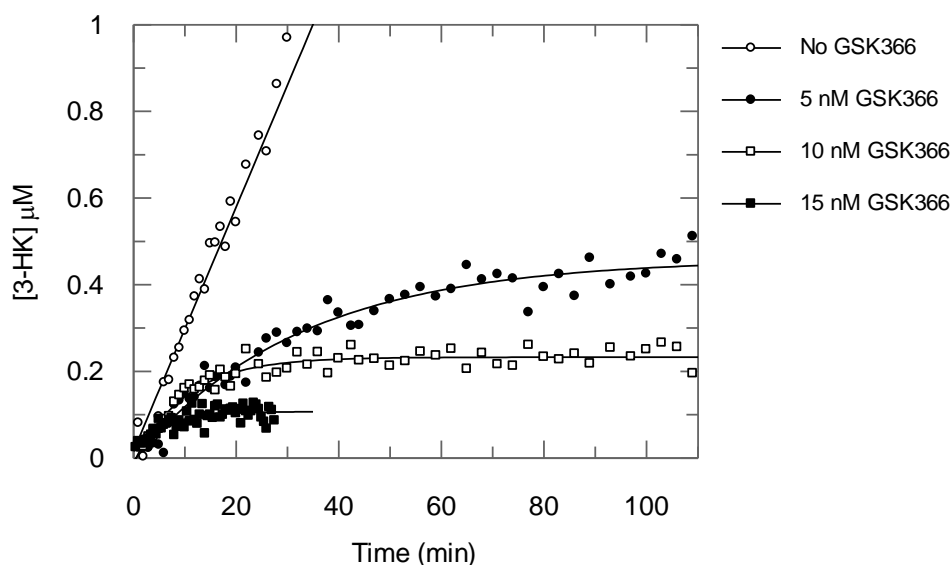

b

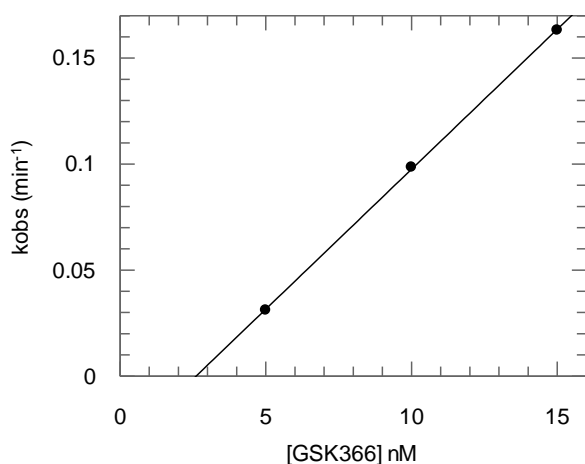

c

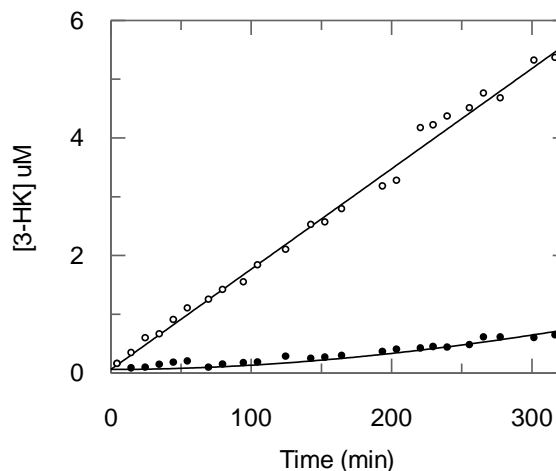

### Supplementary Figure 6. Detailed kinetic analysis of inhibition of KMO by GSK366(C2)

(a) Onset of inhibition timecourses measured in a range of concentrations of GSK366(C2).  $k_{\text{obs}}$  at each inhibitor concentration was obtained by fitting timecourses to Equation 1 (Supplementary Methods). (b) Plot of the resulting  $k_{\text{obs}}$  values against [GSK366(C2)];  $k_{\text{on}} = 1.3 \times 10^6 \text{ M}^{-1}\text{s}^{-1}$  was obtained from a linear fit of the data. (c) Dissociation of GSK366(C2) from KMO. A recovery of activity timecourse was measured after adding a high concentration of L-Kyn to a pre-equilibrated mixture of KMO and inhibitor (closed symbols). [GSK366(C2)] = 5 nM after addition of L-Kyn. The uninhibited timecourse was generated in an equivalent way, omitting the inhibitor (open symbols).  $k_{\text{off}}$  for the inhibitor was obtained by simultaneously fitting both timecourses to a competitive binding model (Supplementary Methods), with  $k_{\text{on}}$  fixed at  $1.3 \times 10^6 \text{ M}^{-1}\text{s}^{-1}$  (see above).  $k_{\text{off}} = 1.6 \times 10^{-5} \text{ s}^{-1}$  (average of two determinations).

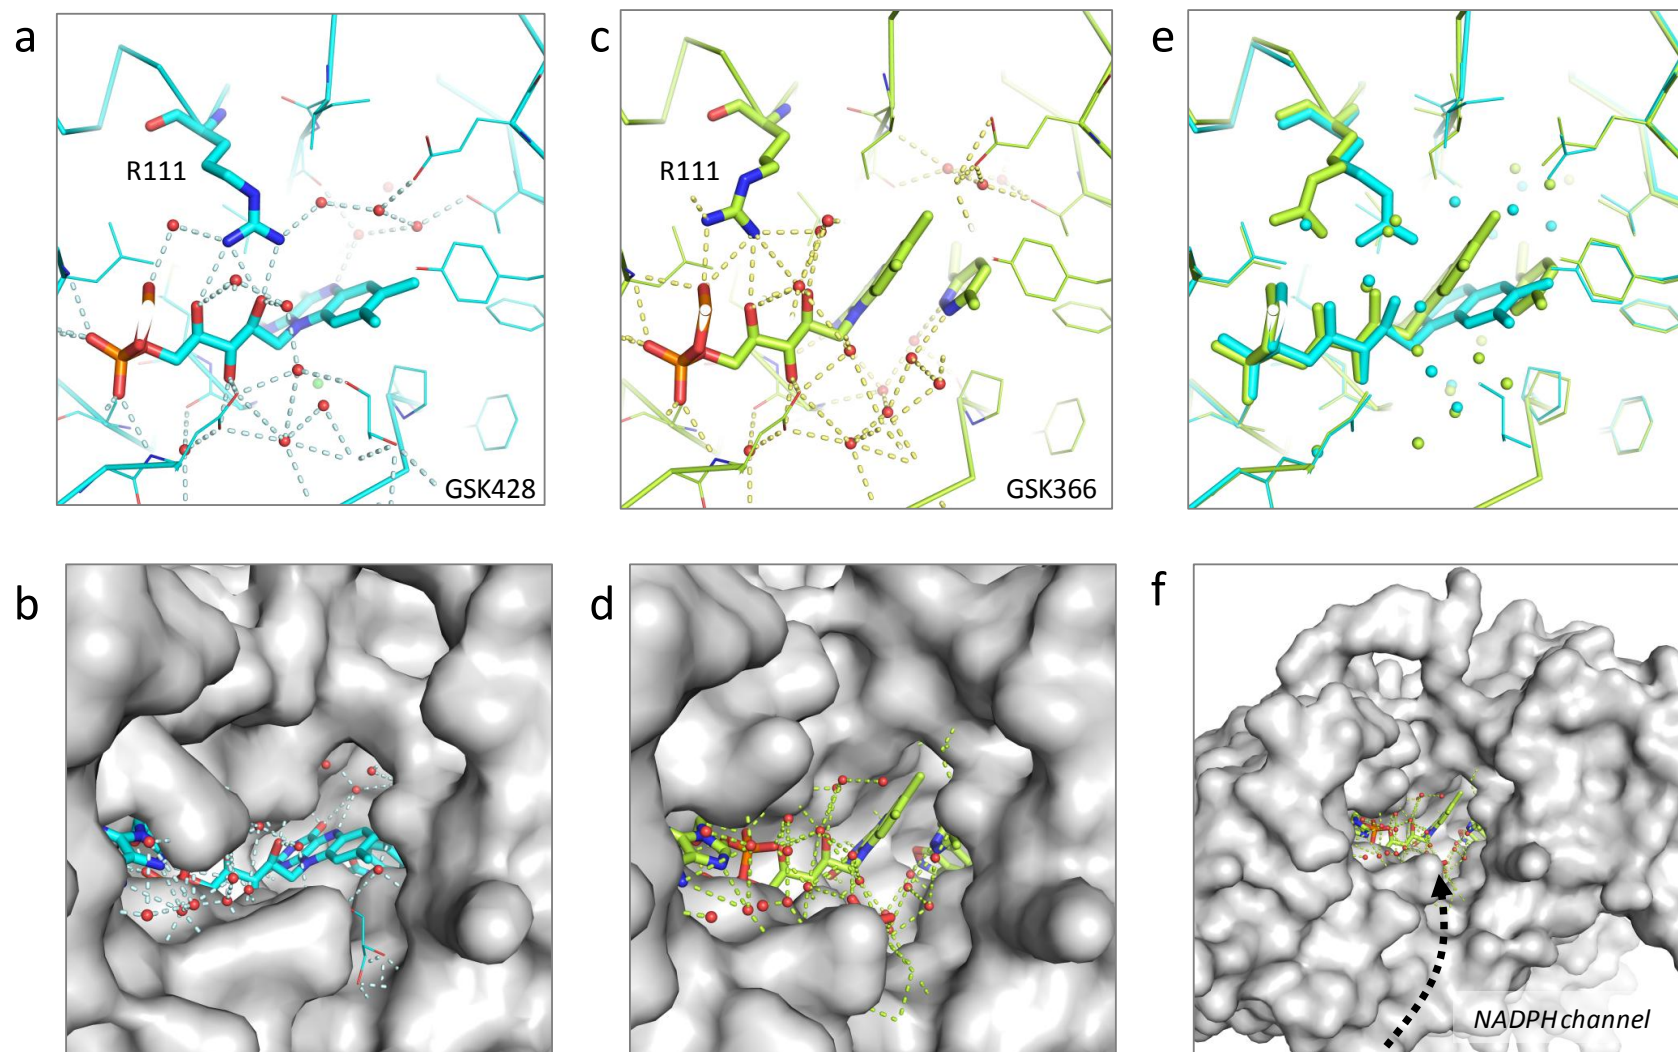

**Supplementary Figure 7. Comparison of Pf-KMO complexes of GSK428 (cyan) and GSK366(C2) (pale green) viewed from solvent channel and putative NADPH access site**

**(a-b)** Enclosed active site of GSK428(A2) with flavin in *in* position, substrate is not visible from solvent channel **(c-d)** Same views as (a-b) but using GSK366(C2) complex **(e-f)** Overlay of structures of GSK428(A2) (cyan) and GSK366(C2)(pale green). Movement of R111 visible.

## L-kynurenine complex

A subunit

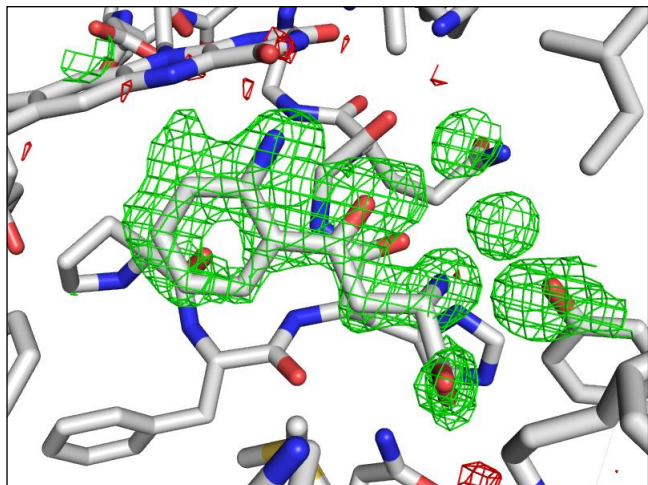

B subunit (ligand not bound)

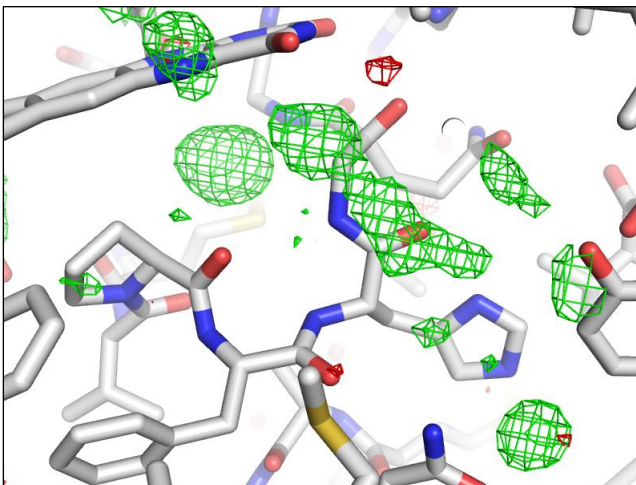

## GSK428(A2) complex

A subunit

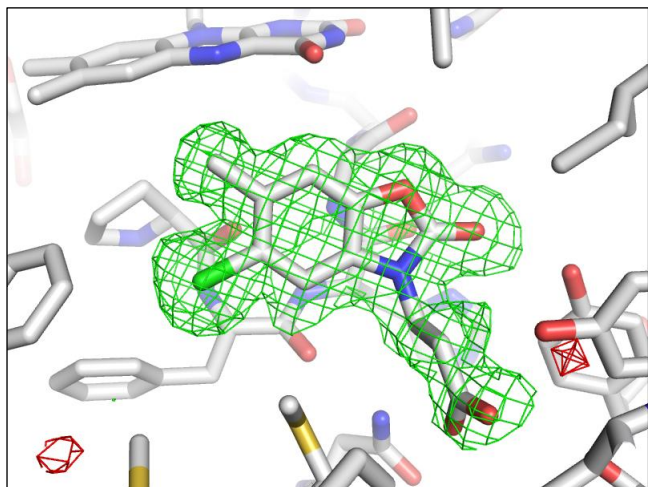

B subunit

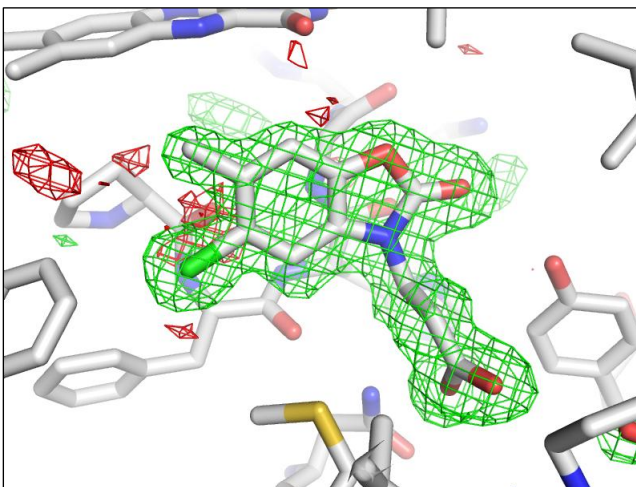**Supplementary Figure 8. Electron density difference maps in the inhibitor binding sites.**

Initial  $F_o - F_c$  electron density maps contoured at  $3\sigma$  (green) and  $-3\sigma$  (red) superposed on the refined protein-inhibitor complex structures. Maps calculated after preliminary refinement of an unliganded protein model against the structure factors of the protein-inhibitor complex.



**GSK775(B2) complex**

A subunit

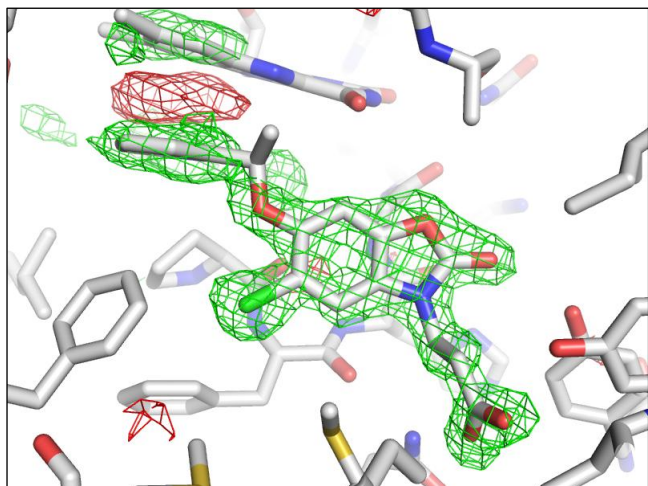

B subunit

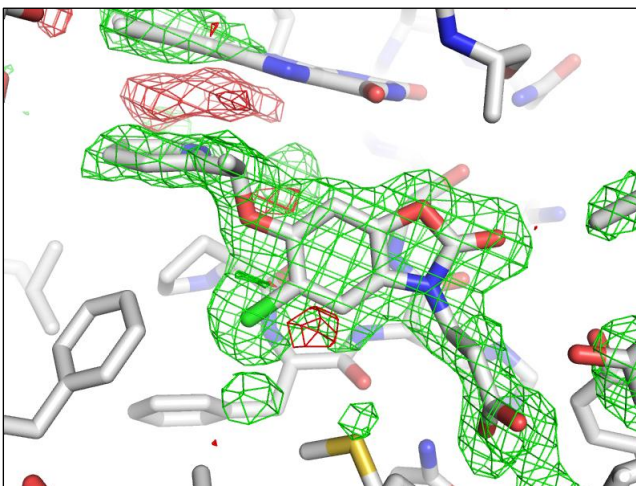**GSK065(C1) complex**

A subunit

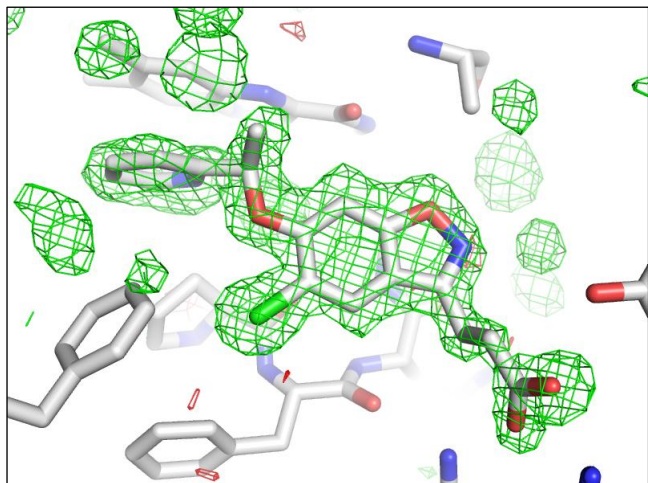

B subunit

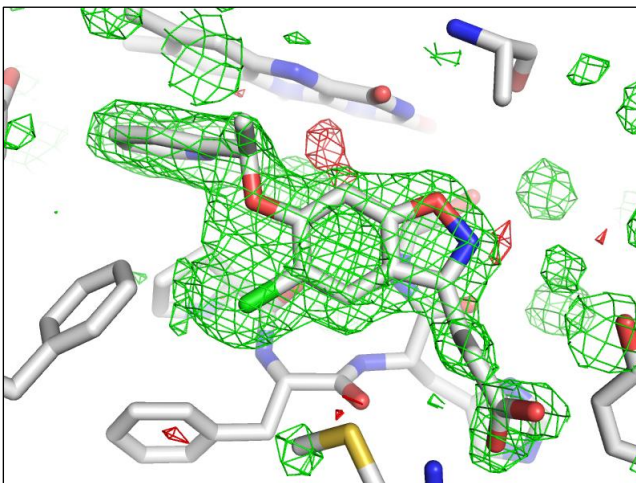**GSK366(C2) complex**

A subunit

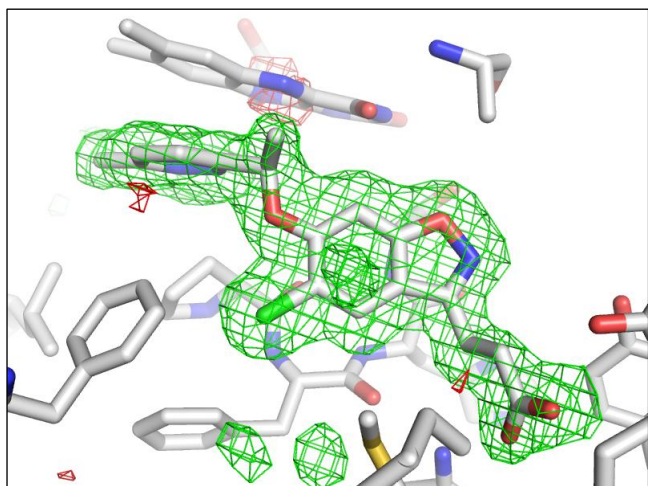

B subunit

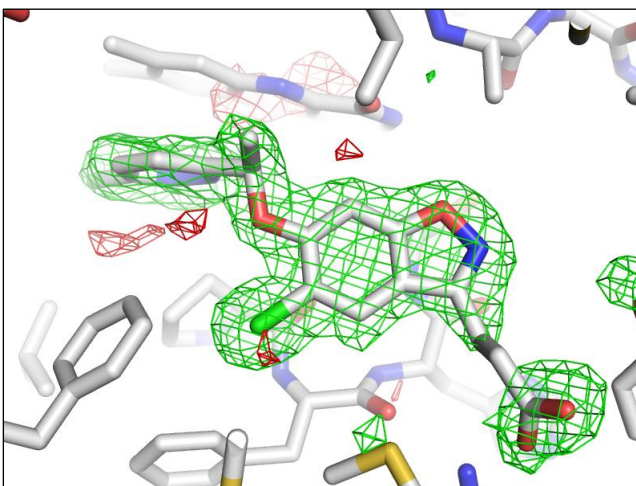**Supplementary Figure 8 cont. Electron density difference maps in inhibitor binding sites.**

**L-kynurenine complex (A subunit)**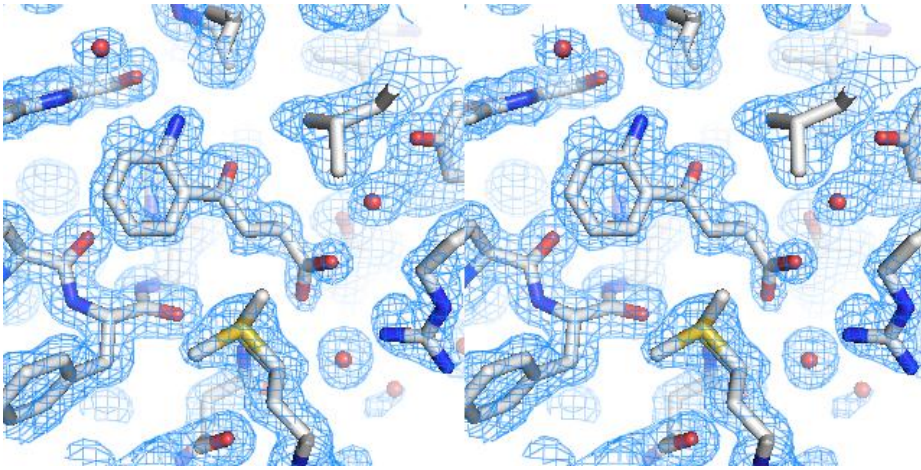**GSK428(A2) complex (A subunit)**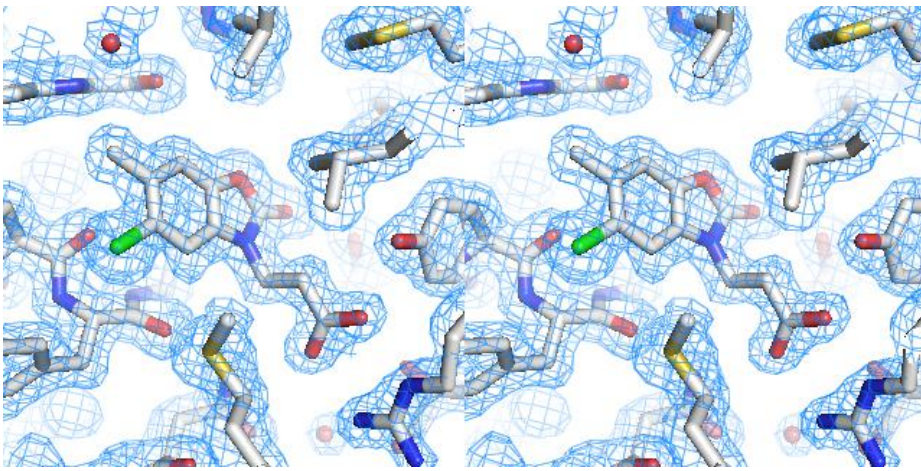**GSK775(B2) complex (A subunit)**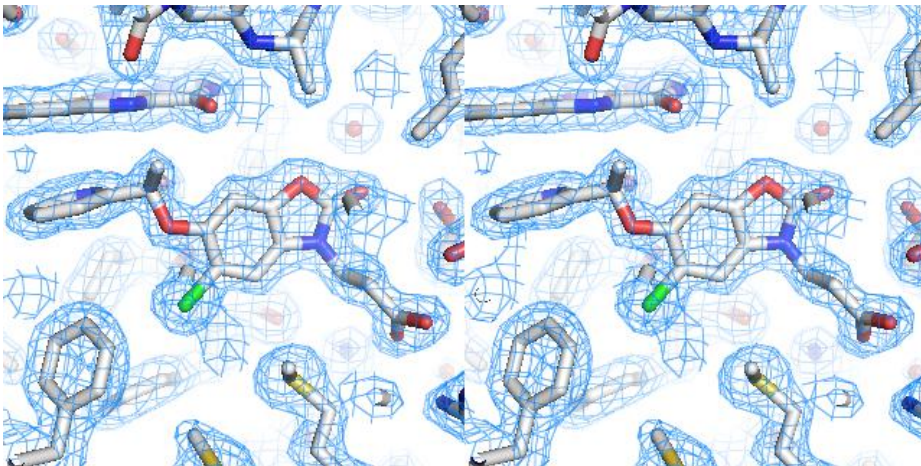

Final  $2F_o - F_c$  electron density maps contoured at  $1\sigma$  (blue) superposed on the coordinates of the corresponding fully refined crystal structure.

**Supplementary Figure 8 cont. Stereoimages of ligand density.**

**GSK065(C1) complex (A subunit)**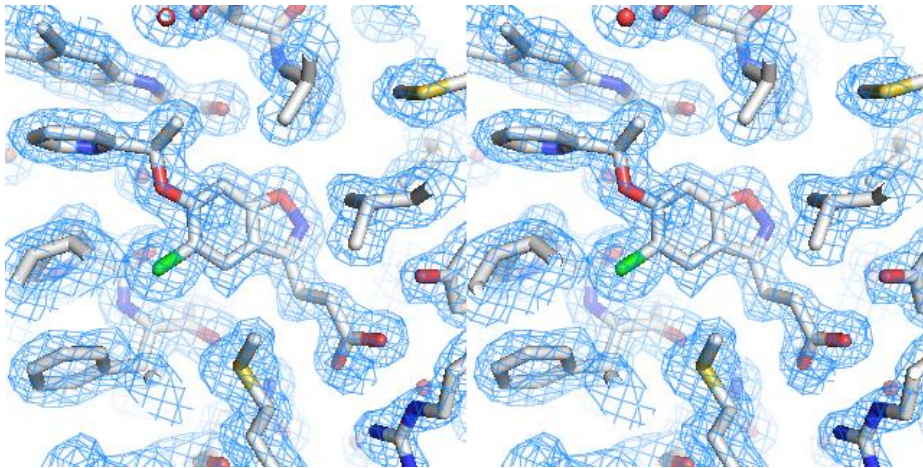**GSK366(C2) complex (A subunit)**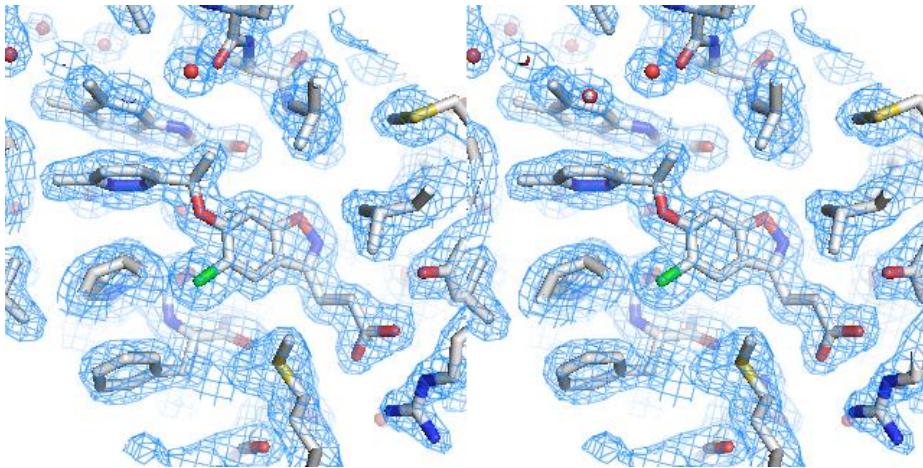

Final  $2F_o - F_c$  electron density maps contoured at  $1\sigma$  (blue) superposed on the coordinates of the corresponding fully refined crystal structure.

**Supplementary Figure 8 cont. Stereoimages of ligand density.**

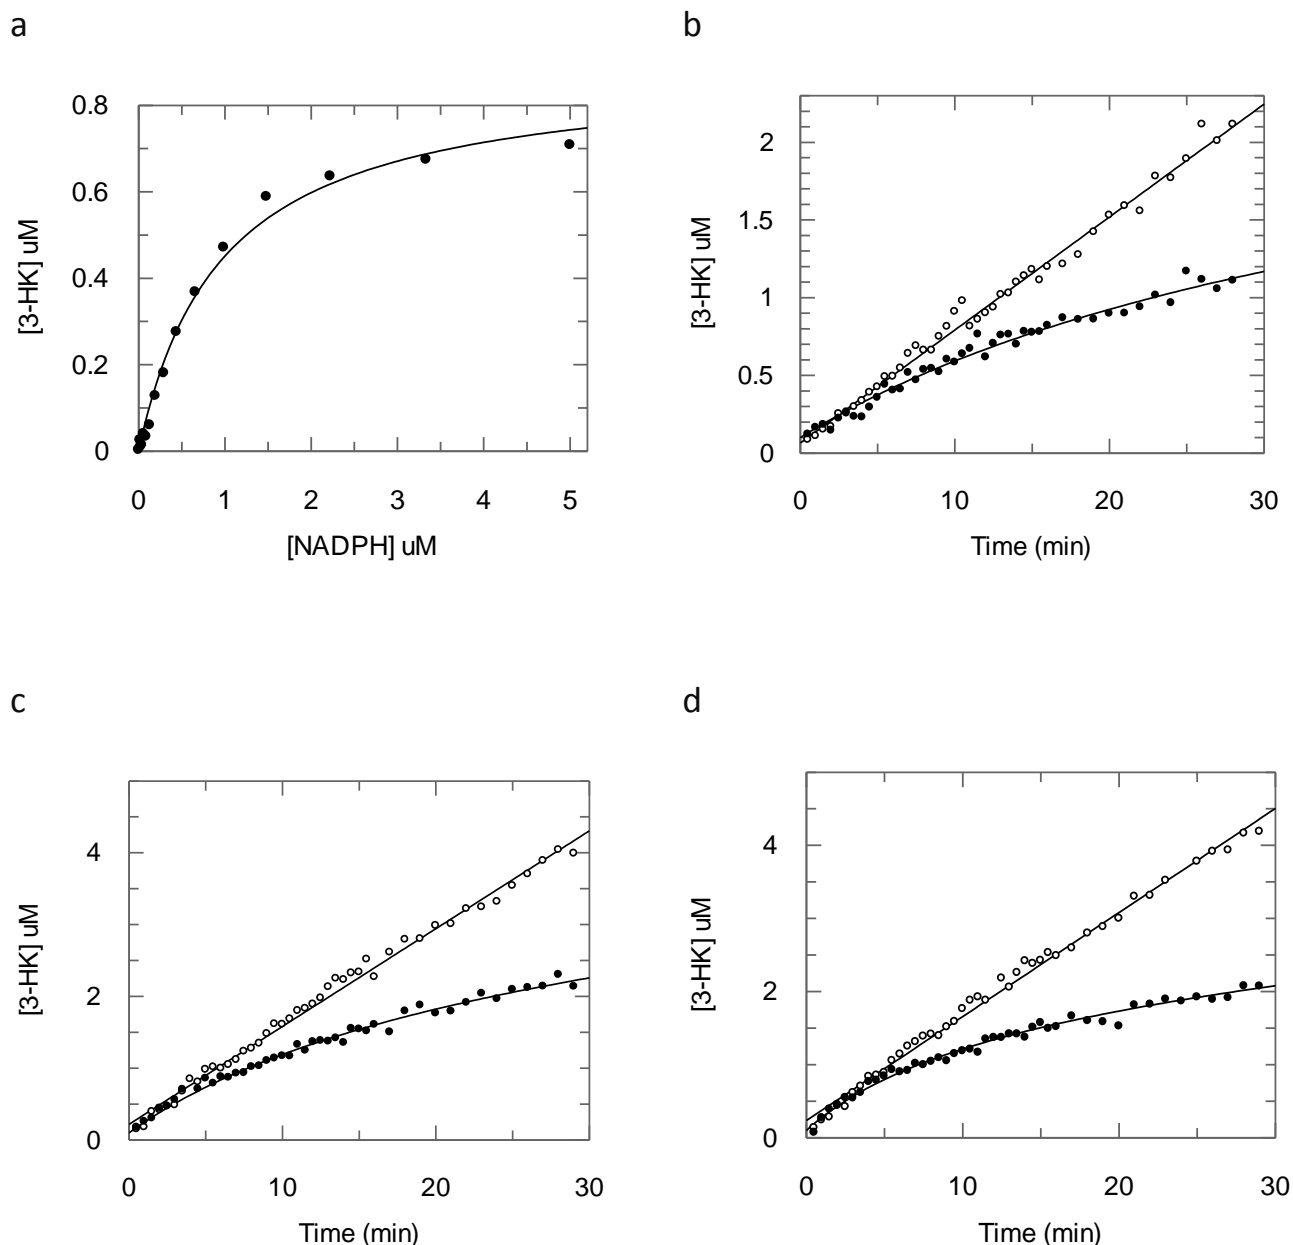

### Supplementary Figure 9. Binding kinetics of GSK775(B2) at sub-saturating [NADPH]

**(a)** Determination of  $K_M$  for NADPH against human KMO, at 10  $\mu\text{M}$  Kynurenine. An NADPH regeneration system was used as described in Lowe et al. (2014)<sup>1</sup>. Data were fitted to the Michaelis-Menten equation with  $K_M = 1.0$   $\mu\text{M}$ . **(b-d)** Onset of inhibition timecourses (closed symbols) measured with 10 nM GSK775(B2) at different concentrations of NADPH.  $k_{\text{obs}}$  values were obtained by fitting to an equation describing onset of inhibition under non-pseudo first order conditions. The corresponding uninhibited timecourses are shown with open symbols and were fitted to a straight line. **(b)** 0.3  $\mu\text{M}$  NADPH,  $k_{\text{obs}} = 0.013$   $\text{min}^{-1}$ ; **(c)** 1  $\mu\text{M}$  NADPH,  $k_{\text{obs}} = 0.035$   $\text{min}^{-1}$ ; **(d)** 5  $\mu\text{M}$  NADPH,  $k_{\text{obs}} = 0.069$   $\text{min}^{-1}$ .

## SUPPLEMENTARY TABLES

## Supplementary Table 1. X-ray data collection and refinement statistics.

|                                      | Apo                       | L-kynurenine              | GSK428(A2)                |
|--------------------------------------|---------------------------|---------------------------|---------------------------|
| Data collection                      |                           |                           |                           |
| Beam line/detector                   | Diamond IO4-1/Pilatus 6M  | Diamond IO4-1/Pilatus 6M  | ESRF ID30B/Pilatus 6M     |
| Space Group                          | P2 <sub>1</sub>           | P2 <sub>1</sub>           | P2 <sub>1</sub>           |
| Resolution (Å)                       | 134-1.94 (1.98-1.94)      | 68-1.50 (1.58-1.50)       | 50-1.62 (1.63-1.62)       |
| Observations                         | 230137 (10056)            | 482557 (68538)            | 384501 (3269)             |
| Unique reflections                   | 71621 (3201)              | 155570 (22560)            | 116150 (1076)             |
| Redundancy                           | 3.2 (3.1)                 | 3.1 (3.0)                 | 3.3 (3.0)                 |
| Completeness (%)                     | 96.4 (86.4)               | 99.7 (99.6)               | 95.9 (89.1)               |
| Mean I/ $\sigma$                     | 16.9 (2.5)                | 8.1 (1.7)                 | 13.7 (1.9)                |
| R <sub>merge</sub>                   | 0.052 (0.578)             | 0.062 (0.614)             | 0.057 (0.603)             |
| CC <sub>1/2</sub>                    | 0.993 (0.542)             | 0.998 (0.495)             | 0.998 (0.725)             |
| Refinement                           |                           |                           |                           |
| Resolution (Å)                       | 134-1.94 (1.99-1.94)      | 68-1.50 (1.54-1.50)       | 50-1.63 (1.67-1.63)       |
| Reflections                          | 71566 (4680)              | 155537 (11388)            | 115718 (7959)             |
| R <sub>work</sub> /R <sub>free</sub> | 0.201/0.231 (0.280/0.323) | 0.189/0.210 (0.246/0.264) | 0.166/0.186 (0.246/0.266) |
| Total number of atoms                | 7725                      | 8222                      | 8200                      |
| Protein atoms                        | 6993                      | 7003                      | 7000                      |
| Ligand atoms                         | 120                       | 135                       | 190                       |
| Waters                               | 612                       | 1084                      | 1010                      |
| Average B-factors (Å <sup>2</sup> )  |                           |                           |                           |
| Protein (main chain/side chain)      | 29.6/38.0                 | 24.1/30.8                 | 21.9/29.2                 |
| Ligand atoms                         | 19.7                      | 18.3                      | 21.9                      |
| Waters                               | 38.5                      | 41.0                      | 40.1                      |
| RMS deviations from ideal values     |                           |                           |                           |
| Bond lengths (Å)                     | 0.010                     | 0.010                     | 0.010                     |
| Bond angles (°)                      | 0.96                      | 0.96                      | 0.97                      |

Values for the highest resolution shell are given in parentheses

**Supplementary Table 1 cont. X-ray data collection and refinement statistics.**

|                                          | GSK775(B2)                | GSK065(C1)                | GSK366(C2)                |
|------------------------------------------|---------------------------|---------------------------|---------------------------|
| <b>Data collection</b>                   |                           |                           |                           |
| Beam line/detector                       | ESRF ID30B/Pilatus 6M     | ID23-1/Pilatus 6M         | ID30A-1/Pilatus 2M        |
| Space Group                              | P2 <sub>1</sub>           | P2 <sub>1</sub>           | P2 <sub>1</sub>           |
| Resolution (Å)                           | 67-1.76 (1.77-1.76)       | 50-1.68 (1.74-1.68)       | 49-1.75 (1.81-1.75)       |
| Observations                             | 305615 (3236)             | 362111 (27281)            | 328445 (30375)            |
| Unique reflections                       | 92637 (964)               | 108786 (10114)            | 95918 (9341)              |
| Redundancy                               | 3.3 (3.4)                 | 3.3 (2.7)                 | 3.4 (3.3)                 |
| Completeness (%)                         | 98.0 (96.0)               | 99.1 (94.5)               | 99.8 (99.7)               |
| Mean I/ $\sigma$                         | 12.6 (2.0)                | 12.9 (1.6)                | 13.4 (1.5)                |
| R <sub>merge</sub>                       | 0.057 (0.713)             | 0.052 (0.634)             | 0.051 (0.772)             |
| CC <sub>1/2</sub>                        | 0.998 (0.670)             | 0.999 (0.621)             | 0.999 (0.611)             |
| <b>Refinement</b>                        |                           |                           |                           |
| Resolution (Å)                           | 67-1.76 (1.81-1.76)       | 50-1.68 (1.72-1.68)       | 45-1.75 (1.79-1.75)       |
| Reflections                              | 92615 (6545)              | 108768 (7465)             | 95896 (7054)              |
| R <sub>work</sub> /R <sub>free</sub>     | 0.177/0.206 (0.216/0.237) | 0.169/0.198 (0.267/0.289) | 0.176/0.203 (0.233/0.260) |
| Total number of atoms                    | 7985                      | 8078                      | 7989                      |
| Protein atoms                            | 6972                      | 7008                      | 6991                      |
| Ligand atoms                             | 156                       | 154                       | 174                       |
| Waters                                   | 857                       | 916                       | 824                       |
| <i>Average B-factors (Å<sup>2</sup>)</i> |                           |                           |                           |
| Protein (main chain/side chain)          | 32.0/39.4                 | 25.9/33.7                 | 34.1/42.3                 |
| Ligand atoms                             | 26.1                      | 18.7                      | 24.7                      |
| Waters                                   | 45.0                      | 42.1                      | 48.9                      |
| <i>RMS deviations from ideal values</i>  |                           |                           |                           |
| Bond lengths (Å)                         | 0.010                     | 0.010                     | 0.009                     |
| Bond angles (°)                          | 0.98                      | 0.99                      | 0.96                      |

Values for the highest resolution shell are given in parentheses

## Supplementary references

1. Lowe, D.M. et al. Lead discovery for human kynurenine 3-monooxygenase by high-throughput RapidFire mass spectrometry. *J Biomol Screen* **19**, 508-15 (2014).
